# Supplementary material for: Health Insurance Deductibles and Health Care–Seeking Behaviors in a Consumer-Driven Health Care System With Universal Coverage
Source: PubMed Central journal article supplement (PMC8261614; doi:10.1001/jamanetworkopen.2021.15722), 2021-07-06
Supplement: jamanetwopen-e2115722-s001.pdf [file jamanetwopen-e2115722-s001.pdf]

## Supplementary Online Content

Sandoval JL, Petrovic D, Guessous I, Stringhini S. Health insurance deductibles and health care-seeking behaviors in a consumer-driven health care system with universal coverage. *JAMA Netw Open*. 2021;4(7):e2115722.  
doi:10.1001/jamanetworkopen.2021.15722

**eFigure.** Type of Forgone Care and Income-Related Disparities in Forgoing Health Care

**eTable 1.** Missing Data Details

**eTable 2.** Association Between Deductible Level and Forgoing Health Care (Survey-Weighted)

**eTable 3.** Association Between Deductible Level and Forgoing Dental Health Care (Survey-Weighted)

**eTable 4.** Association Between Deductible Level and Forgoing Health Care in Specific Groups (Survey-Weighted)

**eTable 5.** Association Between Deductible Level and Forgoing Dental Health Care

This supplementary material has been provided by the authors to give readers additional information about their work.

**eFigure – Type of forgone care and income-related disparities in forgoing health care**

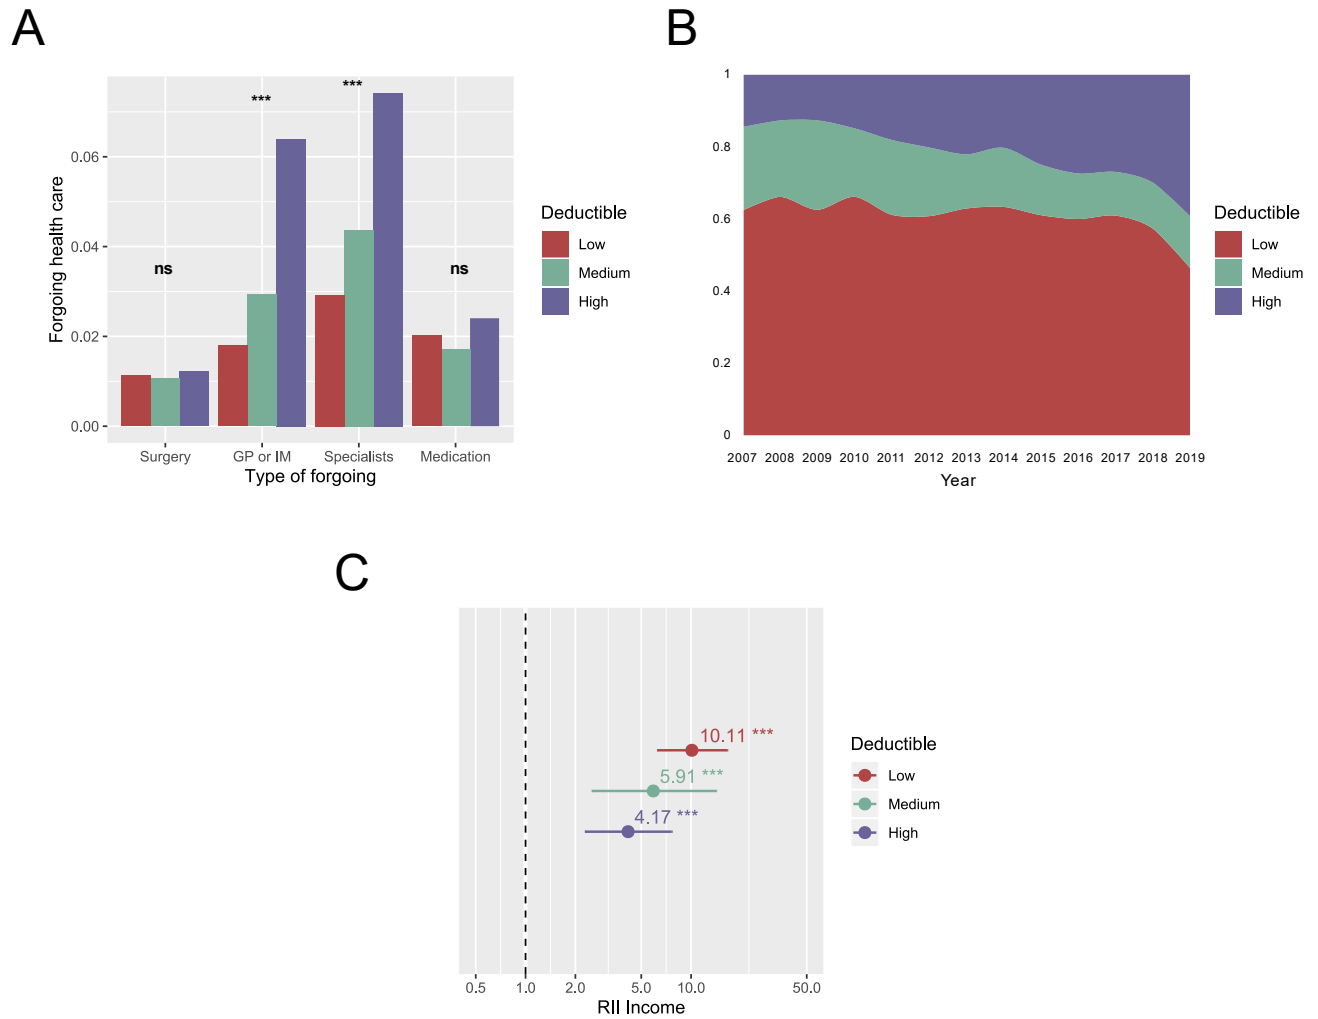

A) proportion of participants forgoing different types of insured care according to deductible level. B) proportion of participants with low, medium or high deductible over time. C) Quantification of income-related health care forgoing according to deductible level. Bars represent 95% CI. RII: relative index of inequality. \* $p < 0.05$ , \*\* $p < 0.01$ , \*\*\* $p < 0.001$ .

**eTable 1 – Missing data details**

| Variable                                        | Missing data, n (%) |                 |                    |                  |
|-------------------------------------------------|---------------------|-----------------|--------------------|------------------|
|                                                 | Overall             | Low deductibles | Medium deductibles | High deductibles |
| <b>Insurance deductibles</b>                    | 702 (5.91%)         | -               | -                  | -                |
| <b>Sex</b>                                      | 0 (0%)              | 0 (0%)          | 0 (0%)             | 0 (0%)           |
| <b>Age</b>                                      | 0 (0%)              | 0 (0%)          | 0 (0%)             | 0 (0%)           |
| <b>Adjusted household income</b>                | 2977 (25.08%)       | 1455 (21.27%)   | 508 (27.09%)       | 702 (28.61%)     |
| <b>Educational attainment</b>                   | 146 (1.23%)         | 83 (1.21%)      | 21 (1.12%)         | 35 (1.43%)       |
| <b>Swiss Nationality</b>                        | 22 (0.19%)          | 11 (0.16%)      | 4 (0.21%)          | 3 (0.12%)        |
| <b>Known comorbidities</b>                      | 10 (0.08%)          | 4 (0.06%)       | 0 (0%)             | 3 (0.12%)        |
| <b>Known cardiovascular risk factors</b>        | 4 (0.03%)           | 0 (0%)          | 0 (0%)             | 0 (0%)           |
| <b>Additional non-mandatory insurance plans</b> | 561 (4.73%)         | 237 (3.46%)     | 69 (3.68%)         | 101 (4.12%)      |
| <b>Subsidized insurance premiums</b>            | 390 (3.29%)         | 152 (2.22%)     | 31 (1.65%)         | 51 (2.08%)       |
| <b>Forgoing health care (non-dental)</b>        | 31 (0.26%)          | 13 (0.19%)      | 4 (0.21%)          | 5 (0.2%)         |
| <b>Forgoing dental care</b>                     | 3 (0.03%)           | 0 (0%)          | 0 (0%)             | 0 (0%)           |

**eTable 2 – Association between deductible level and forgoing health care (survey-weighted)**

|                                                              | Unadjusted                               |                | Adjusted (n=7946)                        |                |
|--------------------------------------------------------------|------------------------------------------|----------------|------------------------------------------|----------------|
|                                                              | Estimate<br>[95% CI]                     | p-value        | Estimate <sup>a</sup><br>[95% CI]        | p-value        |
| <b>RII deductible (lowest to highest deductible level)</b>   | 2.4 [1.5;3.9]                            | 0.006          | 2.5 [1.3;4.6]                            | 0.014          |
| <b>Household adjusted income</b>                             | 0.8 [0.8;0.9]                            | <0.001         | 0.9 [0.8;0.9]                            | 0.001          |
| <b>RII of educational attainment (lowest to highest)</b>     | 0.8 [0.6;1.1]                            | 0.17           | 1.2 [0.8;1.8]                            | 0.31           |
| <b>Swiss nationality (vs foreigners)</b>                     | 0.8 [0.7;0.9]                            | 0.011          | 1 [0.9;1.1]                              | 0.86           |
| <b>Sex (vs male)</b>                                         | 1.2 [0.7;2.1]                            | 0.37           | 1.3 [1.1;1.5]                            | 0.011          |
| <b>Age (per 10 years)</b>                                    | 0.9 [0.8;0.9]                            | 0.002          | 0.9 [0.8;0.9]                            | <0.001         |
| <b>Known comorbidities (vs without)</b>                      | 1.1 [0.9;1.2]                            | 0.40           | 1.2 [0.8;1.6]                            | 0.32           |
| <b>Cardiovascular risk factors (vs without)</b>              | 0.9 [0.8;1.1]                            | 0.30           | 1.1 [0.9;1.3]                            | 0.2            |
| <b>Additional non-mandatory insurance plans (vs without)</b> | 0.5 [0.4;0.5]                            | <0.001         | 0.6 [0.5;0.8]                            | 0.002          |
| <b>Subsidized insurance premiums (vs without)</b>            | 2.0 [1.9;2.1]                            | <0.001         | 1.5 [1.4;1.6]                            | <0.001         |
| <b>Year of survey (per 5 years)</b>                          | 1.2 [1.0;1.4]                            | 0.048          | 1.1 [0.9;1.3]                            | 0.21           |
| <b>Interactions</b>                                          | <b>Estimate<sup>b</sup><br/>[95% CI]</b> | <b>p-value</b> |                                          |                |
| <b>Known comorbidities (vs without)</b>                      | 2.6 [0.9;7.1]                            | 0.07           |                                          |                |
| <b>Cardiovascular risk factors (vs without)</b>              | 0.8 [0.4;1.3]                            | 0.23           |                                          |                |
| <b>Sex (vs male)</b>                                         | 0.6 [0.2;2.6]                            | 0.43           |                                          |                |
| <b>Household adjusted income</b>                             | 1.3 [1.1;1.6]                            | 0.013          |                                          |                |
| <b>Age (per 10 years)</b>                                    | 0.7 [0.6;0.9]                            | 0.016          |                                          |                |
| <b>Deductibles RII according to age categories</b>           | <b>Estimate<br/>[95% CI]</b>             | <b>p-value</b> | <b>Estimate<sup>c</sup><br/>[95% CI]</b> | <b>p-value</b> |
| <b>&lt;40 years</b>                                          | 2.9 [0.7;12.8]                           | 0.09           | 2.8 [0.4;18.2]                           | 0.14           |
| <b>40-64 years</b>                                           | 1.3 [0.7;2.2]                            | 0.34           | 1.9 [1.0;3.6]                            | 0.04           |
| <b>&gt;65 years</b>                                          | 1.4 [0.1;30.5]                           | 0.41           | 2.9 [0.1;99.7]                           | 0.16           |

<sup>a</sup> results from multivariable Poisson regression determining the association between insurance plan deductibles and forgoing health care. RII- relative index of inequality, CI – confidence interval

<sup>b</sup> results from interaction tests between insurance deductibles and the variable of interest in predicting forgoing health care

<sup>c</sup> results from multivariable Poisson regression determining the association between insurance plan deductibles and forgoing health care, by age category and including the same covariates as in <sup>a</sup>.

**eTable 3 – Association between deductible level and forgoing dental health care (survey-weighted)**

|                                                               | Unadjusted           |         | Adjusted (n=7962)                 |         |
|---------------------------------------------------------------|----------------------|---------|-----------------------------------|---------|
|                                                               | Estimate<br>[95% CI] | p-value | Estimate <sup>a</sup><br>[95% CI] | p-value |
| <b>RII deductible (lowest to highest deductible category)</b> | 1.2 [0.8;1.7]        | 0.24    | 1.2 [0.9;1.7]                     | 0.13    |
| <b>Household adjusted income</b>                              | 0.8 [0.8;0.9]        | <0.001  | 0.9 [0.8;0.9]                     | <0.001  |
| <b>RII of educational attainment (lowest to highest)</b>      | 0.6 [0.5;0.8]        | 0.001   | 1.1 [0.9;1.3]                     | 0.47    |
| <b>Swiss nationality (vs foreigners)</b>                      | 0.8 [0.8;1.0]        | 0.05    | 1 [0.9;1.2]                       | 0.83    |
| <b>Sex (vs male)</b>                                          | 1.1 [0.7;1.7]        | 0.64    | 1.1 [0.8;1.4]                     | 0.50    |
| <b>Age (per 10 years)</b>                                     | 0.9 [0.8;0.9]        | 0.002   | 0.9 [0.9;0.9]                     | 0.001   |
| <b>Known comorbidities (vs without)</b>                       | 1.1 [0.7;1.6]        | 0.55    | 1.2 [0.7;2]                       | 0.41    |
| <b>Cardiovascular risk factors (vs without)</b>               | 1.0 [0.9;1.1]        | 0.44    | 1 [0.9;1.1]                       | 0.99    |
| <b>Additional non-mandatory insurance plans (vs without)</b>  | 0.4 [0.3;0.5]        | <0.001  | 0.6 [0.4;0.7]                     | 0.003   |
| <b>Subsidized insurance premiums (vs without)</b>             | 1.9 [1.7;2.2]        | <0.001  | 1.3 [1.1;1.5]                     | 0.011   |
| <b>Year of survey (per 5 years)</b>                           | 1.2 [1.0;1.4]        | 0.063   | 1.1 [1;1.3]                       | 0.12    |

<sup>a</sup> results from multivariable Poisson regression determining the association between insurance plan deductibles and forgoing dental health care. RII- relative index of inequality, CI – confidence interval

**eTable 4 – Association between deductible level and forgoing health care in specific groups (survey-weighted)**

|                                                                                             | <b>Estimate<sup>a</sup><br/>[95% CI]</b> | <b>p-value</b> |
|---------------------------------------------------------------------------------------------|------------------------------------------|----------------|
| <b>RII<sub>Deductibles</sub> in 1<sup>st</sup> tertile of income</b>                        | 2.10 [1.1;4.2]                           | 0.04           |
| <b>RII<sub>Deductibles</sub> in 2<sup>nd</sup> tertile of income</b>                        | 2.0 [1.3;3.1]                            | 0.008          |
| <b>RII<sub>Deductibles</sub> in 3<sup>rd</sup> tertile of income</b>                        | 4.7 [1.0;21.5]                           | 0.051          |
| <b>RII<sub>income</sub> low deductibles</b>                                                 | 4.7 [1.6;14.0]                           | 0.015          |
| <b>RII<sub>income</sub> medium deductibles</b>                                              | 3.0 [0.9;9.7]                            | 0.061          |
| <b>RII<sub>income</sub> high deductibles</b>                                                | 2.3 [0.8;6.7]                            | 0.10           |
| <b>RII<sub>Deductibles</sub> in participants with subsidized premiums</b>                   | 2.5 [1.4;4.8]                            | 0.013          |
| <b>RII<sub>Deductibles</sub> in participants without subsidized premiums</b>                | 2.3 [1.0;5.4]                            | 0.057          |
| <b>RII<sub>Deductibles</sub> in participants with subsidized premiums and low income</b>    | 2.5 [0.9;6.8]                            | 0.061          |
| <b>RII<sub>Deductibles</sub> in participants without subsidized premiums and low income</b> | 1.9 [0.9;3.9]                            | 0.08           |

<sup>a</sup> results from multivariable Poisson regression determining the association between insurance plan deductibles and forgoing health care. RII- relative index of inequality, CI – confidence interval

**eTable 5 – Association between deductible level and forgoing dental health care**

|                                                               | Unadjusted           |         | Adjusted (n=7962)                 |         |
|---------------------------------------------------------------|----------------------|---------|-----------------------------------|---------|
|                                                               | Estimate<br>[95% CI] | p-value | Estimate <sup>a</sup><br>[95% CI] | p-value |
| <b>RII deductible (lowest to highest deductible category)</b> | 1.1 [0.9;1.3]        | 0.60    | 1.1 [0.8;1.4]                     | 0.50    |
| <b>Household adjusted income</b>                              | 0.8 [0.8;0.8]        | <0.001  | 0.8 [0.8;0.9]                     | <0.001  |
| <b>RII of educational attainment (lowest to highest)</b>      | 0.6 [0.5;0.7]        | <0.001  | 1.1 [0.9;1.4]                     | 0.49    |
| <b>Swiss nationality (vs foreigners)</b>                      | 0.8 [0.8;0.9]        | 0.001   | 1.0 [0.9;1.2]                     | 0.57    |
| <b>Sex (vs male)</b>                                          | 1.1 [1.0;1.3]        | 0.03    | 1.1 [1.0;1.2]                     | 0.22    |
| <b>Age (per 10 years)</b>                                     | 0.9 [0.8;0.9]        | <0.001  | 0.9 [0.8;0.9]                     | <0.001  |
| <b>Known comorbidities (vs without)</b>                       | 1.1 [0.9;1.4]        | 0.27    | 1.2 [1.0;1.6]                     | 0.11    |
| <b>Cardiovascular risk factors (vs without)</b>               | 0.9 [0.8;1.0]        | 0.19    | 1.0 [0.9;1.1]                     | 0.96    |
| <b>Additional non-mandatory insurance plans (vs without)</b>  | 0.4 [0.4;0.5]        | <0.001  | 0.6 [0.5;0.7]                     | <0.001  |
| <b>Subsidized insurance premiums (vs without)</b>             | 2.1 [1.8;2.3]        | <0.001  | 1.3 [1.1;1.5]                     | <0.001  |
| <b>Year of survey (per 5 years)</b>                           | 1.2 [1.1;1.3]        | <0.001  | 1.1 [1.0;1.2]                     | 0.008   |

<sup>a</sup> results from multivariable Poisson regression determining the association between insurance plan deductibles and forgoing dental health care. RII- relative index of inequality, CI – confidence interval
